# Supplementary material for: Gap-Filling for Daily Evapotranspiration Observations with full-factorial method at Global Flux Sites
Source: Copernicus journal article supplement (doi:10.5194/essd-2024-291), 2024-08-09
Supplement: Supplementary file 1 [file essd-2024-291-supplement.pdf]

# Gap-Filling for Daily Evapotranspiration Observations with full-factorial method at Global Flux Sites

Xiaowei Wang<sup>1,2</sup>, Fujiao Tang<sup>3</sup>, Yazhen Jiang<sup>1,4\*</sup>, Yunsheng Lou<sup>2</sup>

<sup>1</sup>State Key Laboratory of Resources and Environment Information System, Institute of Geographic Sciences and Natural Resources Research, Chinese Academy of Sciences, Beijing 100101, China;

<sup>2</sup>School of Ecology and Applied Meteorology, Nanjing University of Information Science & Technology, Nanjing 210044, China;

<sup>3</sup>School of Transportation Science and Engineering, Harbin Institute of Technology, 150090 Harbin, China;

<sup>4</sup>University of Chinese Academy of Sciences, Beijing 100049, China.

*Correspondence to:* Yazhen Jiang (jiangyz@reis.ac.cn)

Table S1: Basic information of 339 sites from AmeriFlux, FLUXNET, OzFlux, EuroFlux, ChinaFLUX, TPDC and NCDDC involved in the ET gap filling in this study.

| Site            | Longitude(°) | Latitude(°) | IGBP | Temporalcoverage | Network         |
|-----------------|--------------|-------------|------|------------------|-----------------|
| ArcturusEmerald | 148.4746     | -23.85872   | GRA  | 2012-2013        | OzFlux          |
| AR-SLu          | -66.4598     | -33.4648    | MF   | 2009-2011        | FLUXNET         |
| AT-Neu          | 11.3175      | 47.1167     | GRA  | 2002-2012        | FLUXNET         |
| AU-Ade          | 131.1178     | -13.0769    | WSA  | 2007-2009        | FLUXNET         |
| AU-ASM          | 133.249      | -22.283     | SAV  | 2010-2022        | OzFlux, FLUXNET |
| AU-Cpr          | 140.5891     | -34.0021    | SAV  | 2010-2014        | FLUXNET         |
| AU-Cum          | 150.7236     | -33.6152    | EBF  | 2012-2022        | OzFlux, FLUXNET |
| AU-DaP          | 131.3181     | -14.0633    | GRA  | 2007-2013        | FLUXNET         |
| AU-DaS          | 131.3881     | -14.1593    | SAV  | 2008-2022        | OzFlux, FLUXNET |
| AU-Dry          | 132.3706     | -15.2588    | SAV  | 2008-2022        | OzFlux, FLUXNET |
| AU-Emr          | 148.4746     | -23.8587    | GRA  | 2011-2013        | FLUXNET         |
| AU-Fog          | 131.3072     | -12.5452    | WET  | 2006-2008        | FLUXNET         |
| AU-Gin          | 115.7138     | -31.3764    | WSA  | 2011-2022        | OzFlux, FLUXNET |
| AU-GWW          | 120.6541     | -30.1913    | SAV  | 2013-2022        | OzFlux, FLUXNET |
| AU-How          | 131.1523     | -12.4943    | WSA  | 2001-2014        | FLUXNET         |
| AU-Lox          | 140.6551     | -34.4704    | DBF  | 2008-2009        | FLUXNET         |
| AU-RDF          | 132.4776     | -14.5636    | WSA  | 2011-2013        | FLUXNET         |
| AU-Rig          | 145.5759     | -36.6499    | GRA  | 2011-2014        | FLUXNET         |
| AU-Rob          | 145.6301     | -17.1175    | EBF  | 2014-2014        | FLUXNET         |
| AU-Stp          | 133.3502     | -17.1507    | GRA  | 2008-2014        | FLUXNET         |
| AU-TTE          | 133.64       | -22.287     | GRA  | 2012-2021        | OzFlux, FLUXNET |
| AU-Tum          | 148.1517     | -35.6566    | EBF  | 2001-2022        | OzFlux, FLUXNET |
| AU-Wac          | 145.1878     | -37.4259    | EBF  | 2005-2013        | OzFlux, FLUXNET |
| AU-Whr          | 145.0294     | -36.6732    | EBF  | 2011-2021        | OzFlux, FLUXNET |
| AU-Wom          | 144.0944     | -37.4222    | EBF  | 2010-2020        | OzFlux, FLUXNET |

|                 |            |            |     |           |                    |
|-----------------|------------|------------|-----|-----------|--------------------|
| AU-Ync          | 146.2907   | -34.9893   | GRA | 2012-2014 | OzFlux, FLUXNET    |
| BE-Bra          | 4.5198     | 51.3076    | MF  | 1996-2014 | EuroFlux, FLUXNET  |
| BE-Lcr          | 3.85043    | 51.11218   | DBF | 2019-2022 | EuroFlux           |
| BE-Lon          | 4.7462     | 50.5516    | CRO | 2004-2020 | EuroFlux, FLUXNET  |
| BE-Maa          | 5.631851   | 50.979868  | CSH | 2016-2021 | EuroFlux           |
| BE-Vie          | 5.9981     | 50.3049    | MF  | 1996-2014 | FLUXNET            |
| Boyagin         | 116.938559 | -32.477093 | CSH | 2018-2022 | OzFlux             |
| BR-Sa3          | -54.9714   | -3.018     | EBF | 2000-2004 | FLUXNET            |
| CA-Ca1          | -125.3336  | 49.8673    | ENF | 1996-2010 | AmeriFlux          |
| CA-Ca2          | -125.2909  | 49.8705    | ENF | 1999-2010 | AmeriFlux          |
| CA-Cbo          | -79.9333   | 44.3167    | DBF | 1994-2020 | AmeriFlux          |
| CA-DB2          | -122.9951  | 49.119     | WET | 2019-2020 | AmeriFlux          |
| CA-DBB          | -122.9849  | 49.1293    | WET | 2014-2020 | AmeriFlux          |
| CA-Gro          | -82.1556   | 48.2167    | MF  | 2003-2014 | AmeriFlux, FLUXNET |
| CA-LP1          | -122.8414  | 55.1119    | ENF | 2007-2020 | AmeriFlux          |
| Calperum        | 140.58912  | -34.00206  | CSH | 2011-2022 | OzFlux             |
| CA-MA2          | -97.8762   | 50.171     | CRO | 2009-2011 | AmeriFlux          |
| CA-MA3          | -97.8686   | 50.1774    | GRA | 2009-2011 | AmeriFlux          |
| CA-Obs          | -105.1178  | 53.9872    | ENF | 1997-2010 | FLUXNET            |
| CapeTribulation | 145.446922 | -16.103219 | ENF | 2010-2017 | OzFlux             |
| CA-Qfo          | -74.3421   | 49.6925    | ENF | 2003-2010 | AmeriFlux, FLUXNET |
| CA-SF1          | -105.8176  | 54.485     | ENF | 2003-2006 | AmeriFlux, FLUXNET |
| CA-SF2          | -105.8775  | 54.2539    | ENF | 2001-2005 | AmeriFlux, FLUXNET |
| CA-SF3          | -106.0053  | 54.0916    | OSH | 2001-2006 | FLUXNET            |
| CA-TP1          | -80.5595   | 42.6609    | ENF | 2002-2015 | AmeriFlux, FLUXNET |
| CA-TP2          | -80.4588   | 42.7744    | ENF | 2002-2007 | FLUXNET            |
| CA-TP3          | -80.3483   | 42.7068    | ENF | 2002-2017 | AmeriFlux, FLUXNET |
| CA-TP4          | -80.3574   | 42.7102    | ENF | 2002-2014 | FLUXNET            |
| CA-TPD          | -80.5577   | 42.6353    | DBF | 2012-2017 | AmeriFlux, FLUXNET |
| CH-BaA          | 7.5956     | 47.55123   | URB | 2016-2020 | EuroFlux           |
| CH-Cha          | 8.4104     | 47.2102    | GRA | 2005-2021 | EuroFlux, FLUXNET  |
| CH-Dav          | 9.8559     | 46.8153    | ENF | 1997-2014 | FLUXNET            |
| CH-Fru          | 8.5378     | 47.1158    | GRA | 2005-2020 | EuroFlux, FLUXNET  |
| CH-Oe1          | 7.73194    | 47.28583   | GRA | 2002-2008 | EuroFlux           |
| CH-Oe2          | 7.73375    | 47.28642   | CRO | 2004-2021 | EuroFlux           |
| CN-ARou         | 101.4643   | 39.0473    | GRA | 2015-2019 | ChinaFLUX          |
| CN-Cng          | 123.5092   | 44.5934    | GRA | 2007-2010 | FLUXNET            |
| CN-Damao        | 110.32839  | 41.64394   | GRA | 2015-2018 | ChinaFLUX          |
| CN-Du2          | 116.2836   | 42.0467    | GRA | 2006-2008 | FLUXNET            |
| CN-Du3          | 116.2809   | 42.0551    | GRA | 2009-2010 | FLUXNET            |
| CN-HaM          | 101.18     | 37.37      | GRA | 2002-2004 | FLUXNET            |
| CN-Huailai      | 115.788    | 40.3491    | CRO | 2013-2017 | TPDC               |
| CN-HuaZhaizi    | 100.3201   | 38.7659    | BAR | 2015-2019 | TPDC               |
| CN-Jinzhou      | 121.201667 | 41.148056  | CRO | 2005-2014 | ChinaFLUX          |
| CN-Jurong       | 119.217264 | 31.806831  | CRO | 2015-2020 | ChinaFLUX          |
| CN-SiDaoqiao1   | 101.1374   | 42.0012    | OSH | 2015-2019 | TPDC               |
| CN-SiDaoqiao2   | 101.1335   | 41.9903    | MF  | 2017-2019 | TPDC               |
| CN-Xilinhot     | 116.671389 | 43.554444  | GRA | 2006-2015 | ChinaFLUX          |

|                 |             |             |     |           |                   |
|-----------------|-------------|-------------|-----|-----------|-------------------|
| CN-Yakou        | 100.2421    | 38.0142     | GRA | 2015-2019 | TPDC              |
| CN-Zhangye      | 100.4464    | 38.97514    | WET | 2017-2019 | NCDDC             |
| Collie          | 21.62919813 | 1.618787868 | EBF | 2018-2018 | OzFlux            |
| CowBay          | 145.42715   | -16.238189  | ENF | 2009-2022 | OzFlux            |
| CumberlandPlain | 150.723611  | -33.615278  | ENF | 2018-2018 | OzFlux            |
| CZ-BK1          | 18.53688    | 49.50208    | ENF | 2004-2021 | EuroFlux          |
| CZ-KrP          | 15.078773   | 49.573257   | CRO | 2014-2020 | EuroFlux          |
| CZ-Lnz          | 16.9463317  | 48.6815483  | MF  | 2015-2020 | EuroFlux          |
| CZ-RAJ          | 16.6965125  | 49.4437236  | ENF | 2012-2021 | EuroFlux          |
| CZ-Stn          | 17.9699     | 49.035975   | DBF | 2010-2021 | EuroFlux          |
| CZ-wet          | 14.77035    | 49.02465    | WET | 2006-2022 | EuroFlux, FLUXNET |
| DE-Akm          | 13.68342    | 53.86617    | WET | 2009-2015 | EuroFlux          |
| DE-Bay          | 11.86694    | 50.14194    | ENF | 1996-1999 | EuroFlux          |
| DE-Dgw          | 13.0542746  | 53.1514092  | WAT | 2015-2018 | EuroFlux          |
| DE-Geb          | 10.9146     | 51.0997     | CRO | 2001-2020 | EuroFlux, FLUXNET |
| DE-Gri          | 13.5126     | 50.95       | GRA | 2004-2014 | EuroFlux, FLUXNET |
| DE-Hai          | 10.4522     | 51.0792     | DBF | 2000-2016 | EuroFlux, FLUXNET |
| DE-HoH          | 11.22235    | 52.08656    | DBF | 2015-2020 | EuroFlux          |
| DE-Kli          | 13.5224     | 50.8931     | CRO | 2004-2017 | EuroFlux, FLUXNET |
| DE-Lkb          | 13.3047     | 49.0996     | ENF | 2009-2013 | EuroFlux, FLUXNET |
| DE-Lnf          | 10.3678     | 51.3282     | DBF | 2002-2012 | FLUXNET           |
| DE-Me2          | 10.65555    | 51.275366   | GRA | 2004-2006 | EuroFlux          |
| DE-Meh          | 10.65547222 | 51.27530556 | MF  | 2003-2006 | EuroFlux          |
| DE-Obe          | 13.7213     | 50.7867     | ENF | 2008-2014 | EuroFlux, FLUXNET |
| DE-RuR          | 6.3041      | 50.6219     | GRA | 2011-2022 | EuroFlux, FLUXNET |
| DE-RuS          | 6.4471      | 50.8659     | CRO | 2011-2014 | FLUXNET           |
| DE-RuW          | 6.330962475 | 50.50492685 | ENF | 2010-2020 | EuroFlux          |
| DE-Seh          | 6.4497      | 50.8706     | CRO | 2007-2010 | EuroFlux, FLUXNET |
| DE-SfN          | 11.3275     | 47.8064     | WET | 2012-2014 | FLUXNET           |
| DE-Spw          | 14.03369    | 51.89225    | WET | 2010-2015 | EuroFlux          |
| DE-Tha          | 13.5651     | 50.9626     | ENF | 1996-2014 | EuroFlux, FLUXNET |
| DE-Wet          | 11.45753333 | 50.4535     | ENF | 2002-2008 | EuroFlux          |
| DE-Zrk          | 12.889      | 53.8759     | WET | 2013-2017 | EuroFlux, FLUXNET |
| DigbyPlantation | 141.616472  | -37.882694  | CRO | 2018-2020 | OzFlux            |
| DK-Eng          | 12.1918     | 55.6905     | GRA | 2005-2008 | FLUXNET           |
| DK-Fou          | 9.5872      | 56.4842     | CRO | 2005-2005 | EuroFlux, FLUXNET |
| DK-Lva          | 12.08329964 | 55.68330002 | GRA | 2004-2008 | EuroFlux          |
| DK-Ris          | 12.09722222 | 55.53027778 | CRO | 2004-2008 | EuroFlux          |
| DK-Skj          | 8.40481     | 55.91273    | WET | 2009-2022 | EuroFlux          |
| DK-Sor          | 11.6446     | 55.4859     | DBF | 2001-2014 | EuroFlux, FLUXNET |
| DK-Vng          | 9.16070962  | 56.0374765  | CRO | 2009-2018 | EuroFlux          |
| ES-Amo          | -2.2523     | 36.8336     | OSH | 2007-2012 | EuroFlux, FLUXNET |
| ES-ES1          | -0.31999    | 39.34481    | ENF | 1999-2006 | EuroFlux          |
| ES-ES2          | -0.31641    | 39.27438    | CRO | 2004-2008 | EuroFlux          |
| ES-LgS          | -2.9658     | 37.0979     | OSH | 2007-2009 | EuroFlux, FLUXNET |
| ES-LJu          | -2.7521     | 36.9266     | OSH | 2004-2013 | EuroFlux, FLUXNET |
| ES-LMa          | -5.77465    | 39.94033    | SAV | 2004-2011 | EuroFlux          |
| ES-Ln1          | -3.473851   | 36.972098   | OSH | 2008-2009 | EuroFlux          |

|               |             |              |     |           |                   |
|---------------|-------------|--------------|-----|-----------|-------------------|
| ES-Ln2        | -3.47582    | 36.9695      | OSH | 2009-2009 | EuroFlux          |
| ES-VDA        | 1.44738     | 42.15111     | GRA | 2007-2008 | EuroFlux          |
| FI-Hyy        | 24.29477    | 61.84741     | ENF | 1996-2014 | EuroFlux, FLUXNET |
| FI-Jok        | 23.5134     | 60.8986      | CRO | 2000-2003 | EuroFlux, FLUXNET |
| FI-Kaa        | 27.26985    | 69.14057     | WET | 2000-2008 | EuroFlux          |
| FI-Let        | 23.9595     | 60.6418      | ENF | 2009-2012 | FLUXNET           |
| FI-Lom        | 24.2092     | 67.9972      | WET | 2007-2009 | FLUXNET           |
| FI-Sod        | 26.6386     | 67.3624      | ENF | 2001-2012 | EuroFlux, FLUXNET |
| FI-Var        | 29.61       | 67.7549      | ENF | 2016-2022 | EuroFlux          |
| FR-Gri        | 1.9519      | 48.8442      | CRO | 2004-2014 | FLUXNET           |
| FR-Hes        | 7.06465     | 48.6741      | DBF | 2011-2020 | EuroFlux          |
| FR-LBr        | -0.7693     | 44.7171      | ENF | 1996-2008 | FLUXNET           |
| FR-Lq2        | 2.737027778 | 45.63919444  | GRA | 2002-2010 | EuroFlux          |
| FR-Pue        | 3.5957      | 43.7413      | EBF | 2000-2014 | FLUXNET           |
| GatumPasture  | 141.960897  | -37.390033   | CRO | 2016-2021 | OzFlux            |
| GH-Ank        | -2.6942     | 5.2685       | EBF | 2011-2014 | FLUXNET           |
| GL-ZaF        | -20.5545    | 74.4814      | WET | 2008-2011 | FLUXNET           |
| HowardSprings | 131.15005   | -12.4952     | WAT | 2001-2022 | OzFlux            |
| HU-Bug        | 19.60129929 | 46.69110107  | GRA | 2002-2008 | EuroFlux          |
| HU-Mat        | 19.72599983 | 47.84690094  | GRA | 2004-2008 | EuroFlux          |
| IE-Dri        | -8.75180556 | 51.9866944   | GRA | 2002-2012 | EuroFlux          |
| IL-Yat        | 35.05198851 | 31.34504459  | ENF | 2000-2018 | EuroFlux          |
| IS-Gun        | -20.2166996 | 63.83330154  | DBF | 1996-1998 | EuroFlux          |
| IT-BCi        | 14.95744    | 40.52375     | CRO | 2005-2020 | EuroFlux, FLUXNET |
| IT-CA1        | 12.0266     | 42.3804      | DBF | 2011-2014 | EuroFlux, FLUXNET |
| IT-CA2        | 12.026      | 42.3772      | CRO | 2011-2014 | EuroFlux, FLUXNET |
| IT-CA3        | 12.0222     | 42.38        | DBF | 2011-2014 | FLUXNET           |
| IT-Col        | 13.5881     | 41.8494      | DBF | 1996-2014 | EuroFlux, FLUXNET |
| IT-Cp2        | 12.3573     | 41.7043      | EBF | 2012-2014 | FLUXNET           |
| IT-Cpz        | 12.3761     | 41.7052      | EBF | 1997-2008 | EuroFlux, FLUXNET |
| IT-Isp        | 8.6336      | 45.8126      | DBF | 2013-2014 | FLUXNET           |
| IT-La2        | 11.2853     | 45.9542      | ENF | 2000-2002 | EuroFlux          |
| IT-Lav        | 11.2813     | 45.9562      | ENF | 2003-2014 | FLUXNET           |
| IT-Lec        | 11.26975    | 43.30359     | EBF | 2005-2010 | EuroFlux          |
| IT-MBo        | 11.0458     | 46.0147      | GRA | 2003-2013 | EuroFlux, FLUXNET |
| IT-Noe        | 8.1517      | 40.6062      | CSH | 2004-2014 | FLUXNET           |
| IT-PT1        | 9.061       | 45.2009      | DBF | 2002-2004 | FLUXNET           |
| IT-Ren        | 11.4337     | 46.5869      | ENF | 1998-2013 | FLUXNET           |
| IT-Ro2        | 11.9209     | 42.3903      | DBF | 2002-2012 | FLUXNET           |
| IT-SR2        | 10.2909     | 43.732       | ENF | 2013-2014 | FLUXNET           |
| IT-SRo        | 10.2844     | 43.7279      | ENF | 1999-2012 | FLUXNET           |
| IT-Tor        | 7.5781      | 45.8444      | GRA | 2008-2014 | FLUXNET           |
| Litchfield    | 130.7945459 | -13.17904178 | WSA | 2016-2021 | OzFlux            |
| Longreach     | 31.1054725  | 3.48581518   | CVM | 2019-2021 | OzFlux            |
| MY-PSO        | 102.3062    | 2.973        | EBF | 2003-2009 | FLUXNET           |
| NL-Hor        | 5.0713      | 52.2403      | GRA | 2004-2011 | FLUXNET           |
| NL-Loo        | 5.7436      | 52.1666      | ENF | 1996-2014 | FLUXNET           |
| PL-Brd        | 16.299523   | 52.434181    | CRO | 2011-2012 | EuroFlux          |

---

|        |              |             |     |           |                    |
|--------|--------------|-------------|-----|-----------|--------------------|
| PL-Tcz | 16.09748333  | 53.19295    | ENF | 2011-2016 | EuroFlux           |
| PL-wet | 16.3095      | 52.7623     | WET | 2004-2009 | EuroFlux           |
| RU-Che | 161.34143    | 68.61304    | WET | 2002-2016 | EuroFlux           |
| RU-Cok | 147.4943     | 70.8291     | OSH | 2003-2015 | EuroFlux, FLUXNET  |
| RU-Fy2 | 32.901878    | 56.447603   | ENF | 2015-2023 | EuroFlux           |
| RU-Fy3 | 33.0478      | 56.4435     | ENF | 2016-2018 | EuroFlux           |
| RU-Fyo | 32.9221      | 56.4615     | ENF | 1998-2021 | EuroFlux, FLUXNET  |
| RU-Ha1 | 90.0022      | 54.7252     | GRA | 2002-2004 | EuroFlux, FLUXNET  |
| RU-Ha3 | 90.07785     | 54.70455    | GRA | 2004-2004 | EuroFlux           |
| RU-SkP | 129.168      | 62.255      | DNF | 2012-2014 | FLUXNET            |
| RU-Tks | 128.8878     | 71.5943     | GRA | 2010-2014 | FLUXNET            |
| RU-Vrk | 62.9405      | 67.0547     | CSH | 2008-2008 | FLUXNET            |
| RU-Zot | 89.35079956  | 60.80080032 | WSA | 2002-2004 | EuroFlux           |
| SD-Dem | 30.4783      | 13.2829     | SAV | 2005-2009 | FLUXNET            |
| SE-Fla | 19.45694444  | 64.11277777 | ENF | 1996-2009 | EuroFlux           |
| SE-Sk1 | 17.91805556  | 60.125      | ENF | 2004-2008 | EuroFlux           |
| SE-Sk2 | 17.84005556  | 60.12966667 | ENF | 2004-2006 | EuroFlux           |
| SE-St1 | 19.05033     | 68.35415    | WET | 2012-2019 | EuroFlux           |
| SJ-Adv | 15.923       | 78.186      | WET | 2011-2014 | EuroFlux, FLUXNET  |
| SJ-Blv | 11.83109     | 78.92163    | SNO | 2008-2017 | EuroFlux           |
| SK-Ta1 | 20.26111111  | 49.15833333 | ENF | 2006-2007 | EuroFlux           |
| SK-Ta2 | 20.10777778  | 49.12638889 | ENF | 2006-2007 | EuroFlux           |
| SK-Tat | 20.1635      | 49.1207778  | ENF | 2005-2007 | EuroFlux           |
| SN-Dhr | -15.4322     | 15.4028     | SAV | 2010-2013 | EuroFlux, FLUXNET  |
| UK-AMo | -3.2436918   | 55.792546   | WET | 2002-2020 | EuroFlux           |
| UK-EBu | -3.205777778 | 55.866      | GRA | 2004-2008 | EuroFlux           |
| UK-ESa | -2.85861111  | 55.9069444  | CRO | 2003-2006 | EuroFlux           |
| UK-Gri | -3.79805556  | 56.6072222  | ENF | 1997-2011 | EuroFlux           |
| US-A32 | -97.8198     | 36.8193     | GRA | 2015-2017 | AmeriFlux          |
| US-A74 | -97.5489     | 36.8085     | CRO | 2016-2017 | AmeriFlux          |
| US-AR1 | -99.42       | 36.4267     | GRA | 2009-2012 | AmeriFlux, FLUXNET |
| US-AR2 | -99.5975     | 36.6358     | GRA | 2009-2012 | AmeriFlux, FLUXNET |
| US-ARb | -98.0402     | 35.5497     | GRA | 2005-2006 | AmeriFlux, FLUXNET |
| US-ARc | -98.04       | 35.5465     | GRA | 2005-2006 | AmeriFlux, FLUXNET |
| US-ARM | -97.4888     | 36.6058     | CRO | 2003-2020 | AmeriFlux, FLUXNET |
| US-Atq | -157.4089    | 70.4696     | WET | 2003-2008 | FLUXNET            |
| US-Bi1 | -121.4993    | 38.0992     | CRO | 2016-2021 | AmeriFlux          |
| US-Bi2 | -121.5351    | 38.1091     | CRO | 2017-2021 | AmeriFlux          |
| US-Blo | -120.6328    | 38.8953     | ENF | 1997-2007 | FLUXNET            |
| US-BZB | -148.3208    | 64.6955     | WET | 2011-2021 | AmeriFlux          |
| US-BZF | -148.3121    | 64.7013     | WET | 2011-2021 | AmeriFlux          |
| US-BZo | -148.33      | 64.6936     | WET | 2018-2021 | AmeriFlux          |
| US-BZS | -148.3235    | 64.6963     | ENF | 2010-2021 | AmeriFlux          |
| US-Cop | -109.39      | 38.09       | GRA | 2001-2007 | FLUXNET            |
| US-CRT | -83.3471     | 41.6285     | CRO | 2011-2013 | AmeriFlux, FLUXNET |
| US-CS2 | -89.5002     | 44.1467     | ENF | 2018-2021 | AmeriFlux          |
| US-DFC | -89.7117     | 43.3448     | CRO | 2018-2021 | AmeriFlux          |
| US-DS3 | -121.549     | 38.1235     | CRO | 2021-2021 | AmeriFlux          |

---

---

|        |           |         |     |           |                    |
|--------|-----------|---------|-----|-----------|--------------------|
| US-Fcr | -148.9348 | 65.3968 | OSH | 2011-2014 | AmeriFlux          |
| US-Fmf | -111.7273 | 35.1426 | ENF | 2005-2010 | AmeriFlux          |
| US-Fuf | -111.762  | 35.089  | ENF | 2005-2010 | AmeriFlux          |
| US-GBT | -106.2397 | 41.3658 | ENF | 1999-2006 | FLUXNET            |
| US-GLE | -106.2399 | 41.3665 | ENF | 2004-2020 | AmeriFlux, FLUXNET |
| US-Goo | -89.8735  | 34.2547 | GRA | 2002-2006 | FLUXNET            |
| US-HB2 | -79.244   | 33.3242 | ENF | 2019-2019 | AmeriFlux          |
| US-HB3 | -79.2322  | 33.3482 | ENF | 2019-2021 | AmeriFlux          |
| US-Hn2 | -119.4641 | 46.6889 | GRA | 2015-2018 | AmeriFlux          |
| US-Hn3 | -119.4614 | 46.6878 | OSH | 2017-2018 | AmeriFlux          |
| US-IB2 | -88.241   | 41.8406 | GRA | 2004-2011 | FLUXNET            |
| US-ICH | -149.2958 | 68.6068 | OSH | 2007-2021 | AmeriFlux          |
| US-ICs | -149.311  | 68.6058 | WET | 2007-2020 | AmeriFlux          |
| US-ICt | -149.3041 | 68.6063 | OSH | 2007-2021 | AmeriFlux          |
| US-Ivo | -155.7503 | 68.4865 | WET | 2004-2007 | FLUXNET            |
| US-Jo1 | -106.635  | 32.582  | OSH | 2010-2020 | AmeriFlux          |
| US-Jo2 | -106.6032 | 32.5849 | OSH | 2010-2020 | AmeriFlux          |
| US-KFS | -95.1907  | 39.0561 | GRA | 2007-2019 | AmeriFlux          |
| US-KLS | -97.5684  | 38.7745 | GRA | 2012-2019 | AmeriFlux          |
| US-KS1 | -80.6709  | 28.4583 | ENF | 2002-2003 | AmeriFlux, FLUXNET |
| US-KS2 | -80.6715  | 28.6086 | CSH | 2000-2006 | AmeriFlux, FLUXNET |
| US-Lin | -119.0922 | 36.3566 | CRO | 2009-2010 | AmeriFlux, FLUXNET |
| US-Los | -89.9792  | 46.0827 | WET | 2000-2014 | FLUXNET            |
| US-LS2 | -110.1344 | 31.5659 | SAV | 2002-2007 | AmeriFlux          |
| US-LWW | -97.9789  | 34.9604 | GRA | 1997-1998 | FLUXNET            |
| US-Me1 | -121.5    | 44.5794 | ENF | 2004-2005 | AmeriFlux, FLUXNET |
| US-Me2 | -121.5589 | 44.4526 | ENF | 2002-2020 | AmeriFlux, FLUXNET |
| US-Me4 | -121.6224 | 44.4992 | ENF | 1996-2000 | FLUXNET            |
| US-Me5 | -121.5668 | 44.4372 | ENF | 2000-2002 | FLUXNET            |
| US-Me6 | -121.6078 | 44.3233 | ENF | 2012-2021 | AmeriFlux, FLUXNET |
| US-Mo1 | -92.1167  | 39.2298 | CRO | 2015-2021 | AmeriFlux          |
| US-Mo2 | -91.9945  | 38.9488 | GRA | 2018-2021 | AmeriFlux          |
| US-Mo3 | -92.1497  | 39.2311 | CRO | 2016-2021 | AmeriFlux          |
| US-MOz | -92.2     | 38.7441 | DBF | 2004-2019 | AmeriFlux          |
| US-NC1 | -76.7119  | 35.8118 | ENF | 2005-2012 | AmeriFlux          |
| US-NC3 | -76.656   | 35.799  | ENF | 2013-2021 | AmeriFlux          |
| US-NC4 | -75.9038  | 35.7879 | WET | 2009-2021 | AmeriFlux          |
| US-NGB | -156.6092 | 71.28   | SNO | 2012-2019 | AmeriFlux          |
| US-NGC | -163.7002 | 64.8618 | GRA | 2017-2019 | AmeriFlux          |
| US-NR1 | -105.5464 | 40.0329 | ENF | 1998-2016 | AmeriFlux, FLUXNET |
| US-Oho | -83.8438  | 41.5545 | DBF | 2004-2013 | AmeriFlux, FLUXNET |
| US-ONA | -81.9509  | 27.3836 | GRA | 2015-2020 | AmeriFlux          |
| US-Prr | -147.4876 | 65.1237 | ENF | 2010-2014 | FLUXNET            |
| US-RGA | -91.6733  | 34.4159 | CRO | 2021-2021 | AmeriFlux          |
| US-RGB | -121.8579 | 39.5782 | CRO | 2021-2021 | AmeriFlux          |
| US-RGo | -122.0026 | 39.6805 | CRO | 2021-2021 | AmeriFlux          |
| US-RIs | -116.7356 | 43.1439 | CSH | 2014-2021 | AmeriFlux          |
| US-Rms | -116.7486 | 43.0645 | CSH | 2014-2020 | AmeriFlux          |

---

---

|        |           |         |     |           |                    |
|--------|-----------|---------|-----|-----------|--------------------|
| US-Ro1 | -93.0898  | 44.7143 | CRO | 2004-2016 | AmeriFlux          |
| US-Ro2 | -93.0888  | 44.7288 | CRO | 2008-2016 | AmeriFlux          |
| US-Ro4 | -93.0723  | 44.6781 | GRA | 2014-2021 | AmeriFlux          |
| US-Ro5 | -93.0576  | 44.691  | CRO | 2017-2020 | AmeriFlux          |
| US-Ro6 | -93.0578  | 44.6946 | CRO | 2017-2021 | AmeriFlux          |
| US-Rpf | -147.429  | 65.1198 | DBF | 2008-2021 | AmeriFlux          |
| US-Rwe | -116.7591 | 43.0653 | CSH | 2003-2007 | AmeriFlux          |
| US-Rwf | -116.7231 | 43.1207 | CSH | 2014-2020 | AmeriFlux          |
| US-Rws | -116.7132 | 43.1675 | OSH | 2014-2020 | AmeriFlux          |
| US-Sne | -121.7547 | 38.0369 | GRA | 2016-2020 | AmeriFlux          |
| US-Snf | -121.7272 | 38.0402 | GRA | 2018-2020 | AmeriFlux          |
| US-SRC | -110.8395 | 31.9083 | OSH | 2008-2014 | AmeriFlux, FLUXNET |
| US-SRG | -110.8277 | 31.7894 | GRA | 2008-2021 | AmeriFlux, FLUXNET |
| US-SRM | -110.8661 | 31.8214 | WSA | 2004-2014 | FLUXNET            |
| US-Srr | -122.0264 | 38.2006 | WET | 2014-2017 | AmeriFlux          |
| US-SRS | -110.8508 | 31.8173 | WSA | 2011-2018 | AmeriFlux          |
| US-Syv | -89.3477  | 46.242  | MF  | 2001-2021 | AmeriFlux, FLUXNET |
| US-Ton | -120.966  | 38.4309 | WSA | 2001-2020 | AmeriFlux, FLUXNET |
| US-Tw2 | -121.6365 | 38.0969 | CRO | 2012-2013 | AmeriFlux, FLUXNET |
| US-Tw3 | -121.6469 | 38.1152 | CRO | 2013-2018 | AmeriFlux, FLUXNET |
| US-Tw4 | -121.6413 | 38.1027 | WET | 2013-2021 | AmeriFlux, FLUXNET |
| US-Twt | -121.6531 | 38.1087 | CRO | 2009-2014 | FLUXNET            |
| US-Var | -120.9508 | 38.4133 | GRA | 2000-2021 | AmeriFlux, FLUXNET |
| US-WCr | -90.0799  | 45.8059 | DBF | 1999-2014 | FLUXNET            |
| US-Whs | -110.0522 | 31.7438 | OSH | 2007-2020 | AmeriFlux, FLUXNET |
| US-Wi0 | -91.0814  | 46.6188 | ENF | 2002-2002 | AmeriFlux, FLUXNET |
| US-Wi1 | -91.2329  | 46.7305 | DBF | 2003-2003 | AmeriFlux, FLUXNET |
| US-Wi2 | -91.1528  | 46.6869 | ENF | 2003-2003 | FLUXNET            |
| US-Wi3 | -91.0987  | 46.6347 | DBF | 2002-2004 | AmeriFlux, FLUXNET |
| US-Wi4 | -91.1663  | 46.7393 | ENF | 2002-2005 | AmeriFlux, FLUXNET |
| US-Wi6 | -91.2982  | 46.6249 | OSH | 2002-2002 | AmeriFlux, FLUXNET |
| US-Wi8 | -91.2524  | 46.7223 | DBF | 2002-2002 | AmeriFlux, FLUXNET |
| US-Wkg | -109.9419 | 31.7365 | GRA | 2004-2021 | AmeriFlux, FLUXNET |
| US-xAB | -122.3303 | 45.7624 | ENF | 2019-2021 | AmeriFlux          |
| US-xAE | -99.0588  | 35.4106 | GRA | 2017-2021 | AmeriFlux          |
| US-xBA | -156.6194 | 71.2824 | WET | 2019-2021 | AmeriFlux          |
| US-xBL | -78.0716  | 39.0603 | DBF | 2019-2021 | AmeriFlux          |
| US-xBN | -147.5026 | 65.154  | ENF | 2019-2021 | AmeriFlux          |
| US-xBR | -71.2873  | 44.0639 | DBF | 2017-2021 | AmeriFlux          |
| US-xCL | -97.57    | 33.4012 | GRA | 2017-2021 | AmeriFlux          |
| US-xCP | -104.7456 | 40.8155 | GRA | 2016-2021 | AmeriFlux          |
| US-xDC | -99.1066  | 47.1617 | GRA | 2017-2021 | AmeriFlux          |
| US-xDJ | -145.7514 | 63.8811 | ENF | 2019-2021 | AmeriFlux          |
| US-xDL | -87.8039  | 32.5417 | MF  | 2017-2021 | AmeriFlux          |
| US-xDS | -81.4362  | 28.125  | CVM | 2017-2021 | AmeriFlux          |
| US-xGR | -83.5019  | 35.689  | DBF | 2017-2021 | AmeriFlux          |
| US-xHA | -72.1727  | 42.5369 | DBF | 2017-2021 | AmeriFlux          |
| US-xHE | -149.2133 | 63.8757 | OSH | 2017-2021 | AmeriFlux          |

---

---

|            |            |            |     |           |           |
|------------|------------|------------|-----|-----------|-----------|
| US-xJE     | -84.4686   | 31.1948    | ENF | 2017-2021 | AmeriFlux |
| US-xJR     | -106.8425  | 32.5907    | OSH | 2019-2021 | AmeriFlux |
| US-xKA     | -96.6129   | 39.1104    | GRA | 2017-2021 | AmeriFlux |
| US-xKZ     | -96.5631   | 39.1008    | GRA | 2017-2021 | AmeriFlux |
| US-xMB     | -109.3883  | 38.2483    | OSH | 2017-2021 | AmeriFlux |
| US-xML     | -80.5248   | 37.3783    | DBF | 2017-2021 | AmeriFlux |
| US-xNG     | -100.9154  | 46.7697    | GRA | 2017-2021 | AmeriFlux |
| US-xNQ     | -112.4524  | 40.1776    | OSH | 2017-2021 | AmeriFlux |
| US-xRM     | -105.5459  | 40.2759    | ENF | 2017-2021 | AmeriFlux |
| US-xSB     | -81.9934   | 29.6893    | ENF | 2017-2021 | AmeriFlux |
| US-xSC     | -78.1395   | 38.8929    | DBF | 2019-2021 | AmeriFlux |
| US-xSE     | -76.56     | 38.8901    | DBF | 2017-2021 | AmeriFlux |
| US-xSJ     | -119.7323  | 37.1088    | SAV | 2019-2021 | AmeriFlux |
| US-xSL     | -103.0293  | 40.4619    | CRO | 2019-2021 | AmeriFlux |
| US-xSR     | -110.8355  | 31.9107    | OSH | 2017-2021 | AmeriFlux |
| US-xST     | -89.5864   | 45.5089    | DBF | 2017-2021 | AmeriFlux |
| US-xTA     | -87.3933   | 32.9505    | ENF | 2017-2021 | AmeriFlux |
| US-xTR     | -89.5857   | 45.4937    | DBF | 2017-2021 | AmeriFlux |
| US-xUK     | -95.1921   | 39.0404    | DBF | 2017-2021 | AmeriFlux |
| US-xUN     | -89.5373   | 46.2339    | MF  | 2017-2021 | AmeriFlux |
| US-xWD     | -99.2414   | 47.1282    | GRA | 2019-2021 | AmeriFlux |
| US-xYE     | -110.5391  | 44.9535    | ENF | 2018-2021 | AmeriFlux |
| Warra      | 146.65452  | -43.09502  | EBF | 2014-2022 | OzFlux    |
| Yarramundi | 150.763284 | -33.620812 | GRA | 2020-2022 | OzFlux    |
| ZA-Kru     | 31.4969    | -25.0197   | SAV | 2000-2013 | FLUXNET   |
| ZM-Mon     | 23.2525    | -15.4391   | DBF | 2000-2009 | FLUXNET   |

---



Table S2: Methods for calculating meteorological variables based on reanalysis products

$$TA = T_k - 273.15 \quad (1)$$

$$PA = \frac{P}{1000} \quad (2)$$

$$VPD = e_s - e_a \quad (3)$$

$$RH = \left( \frac{e_a}{e_s} \right) \times 100 \quad (4)$$

$$e_s = 0.6108 \times \exp\left(\frac{17.27 \times T}{T + 237.3}\right) \quad (5)$$

$$e_a = 0.6108 \times \exp\left(\frac{17.27 \times T_d}{T_d + 237.3}\right) \quad (6)$$

$$T = T_k - 273.15 \quad (7)$$

$$T_d = T_a - 273.15 \quad (8)$$

$$R_n = \frac{R_s + R_t}{86400} \quad (9)$$

$$WS = \sqrt{u^2 + v^2} \quad (10)$$

$$G = Qg_{avg} \quad (11)$$

Where,  $T_k$  is temperature\_2m, P is surface\_pressure,  $T_a$  is dewpoint\_temperature\_2m,  $R_s$  is surface\_net\_solar\_radiation\_sum,  $R_t$  is surface\_net\_thermal\_radiation\_sum,  $u$  is u\_component\_of\_wind\_10m,  $v$  is v\_component\_of\_wind\_10m.

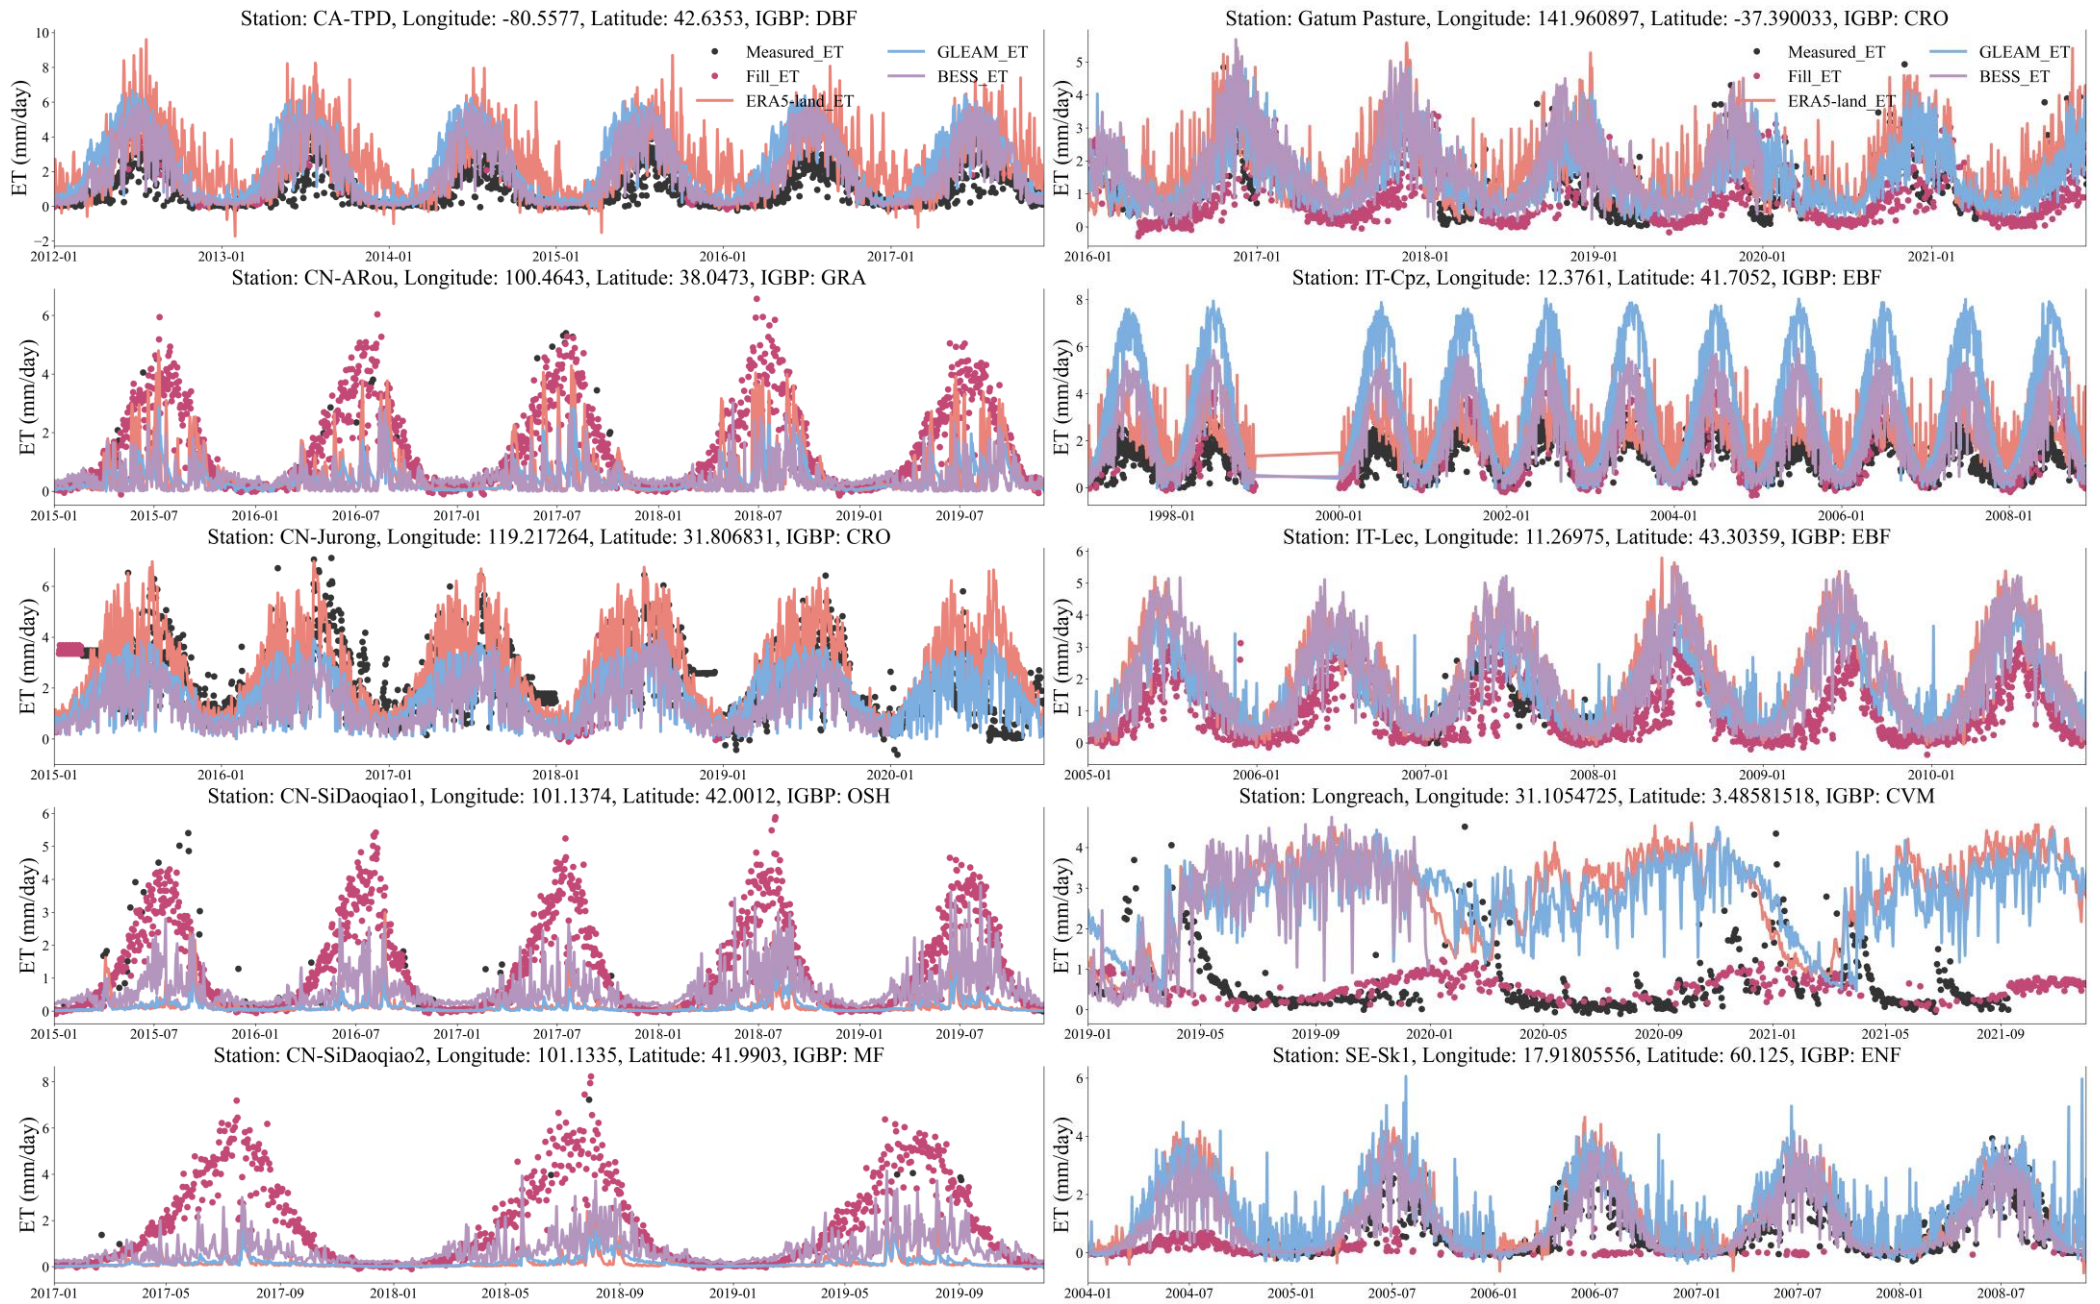

Figure.1S-1 Sites with value range differences between the filled ET and ET products.

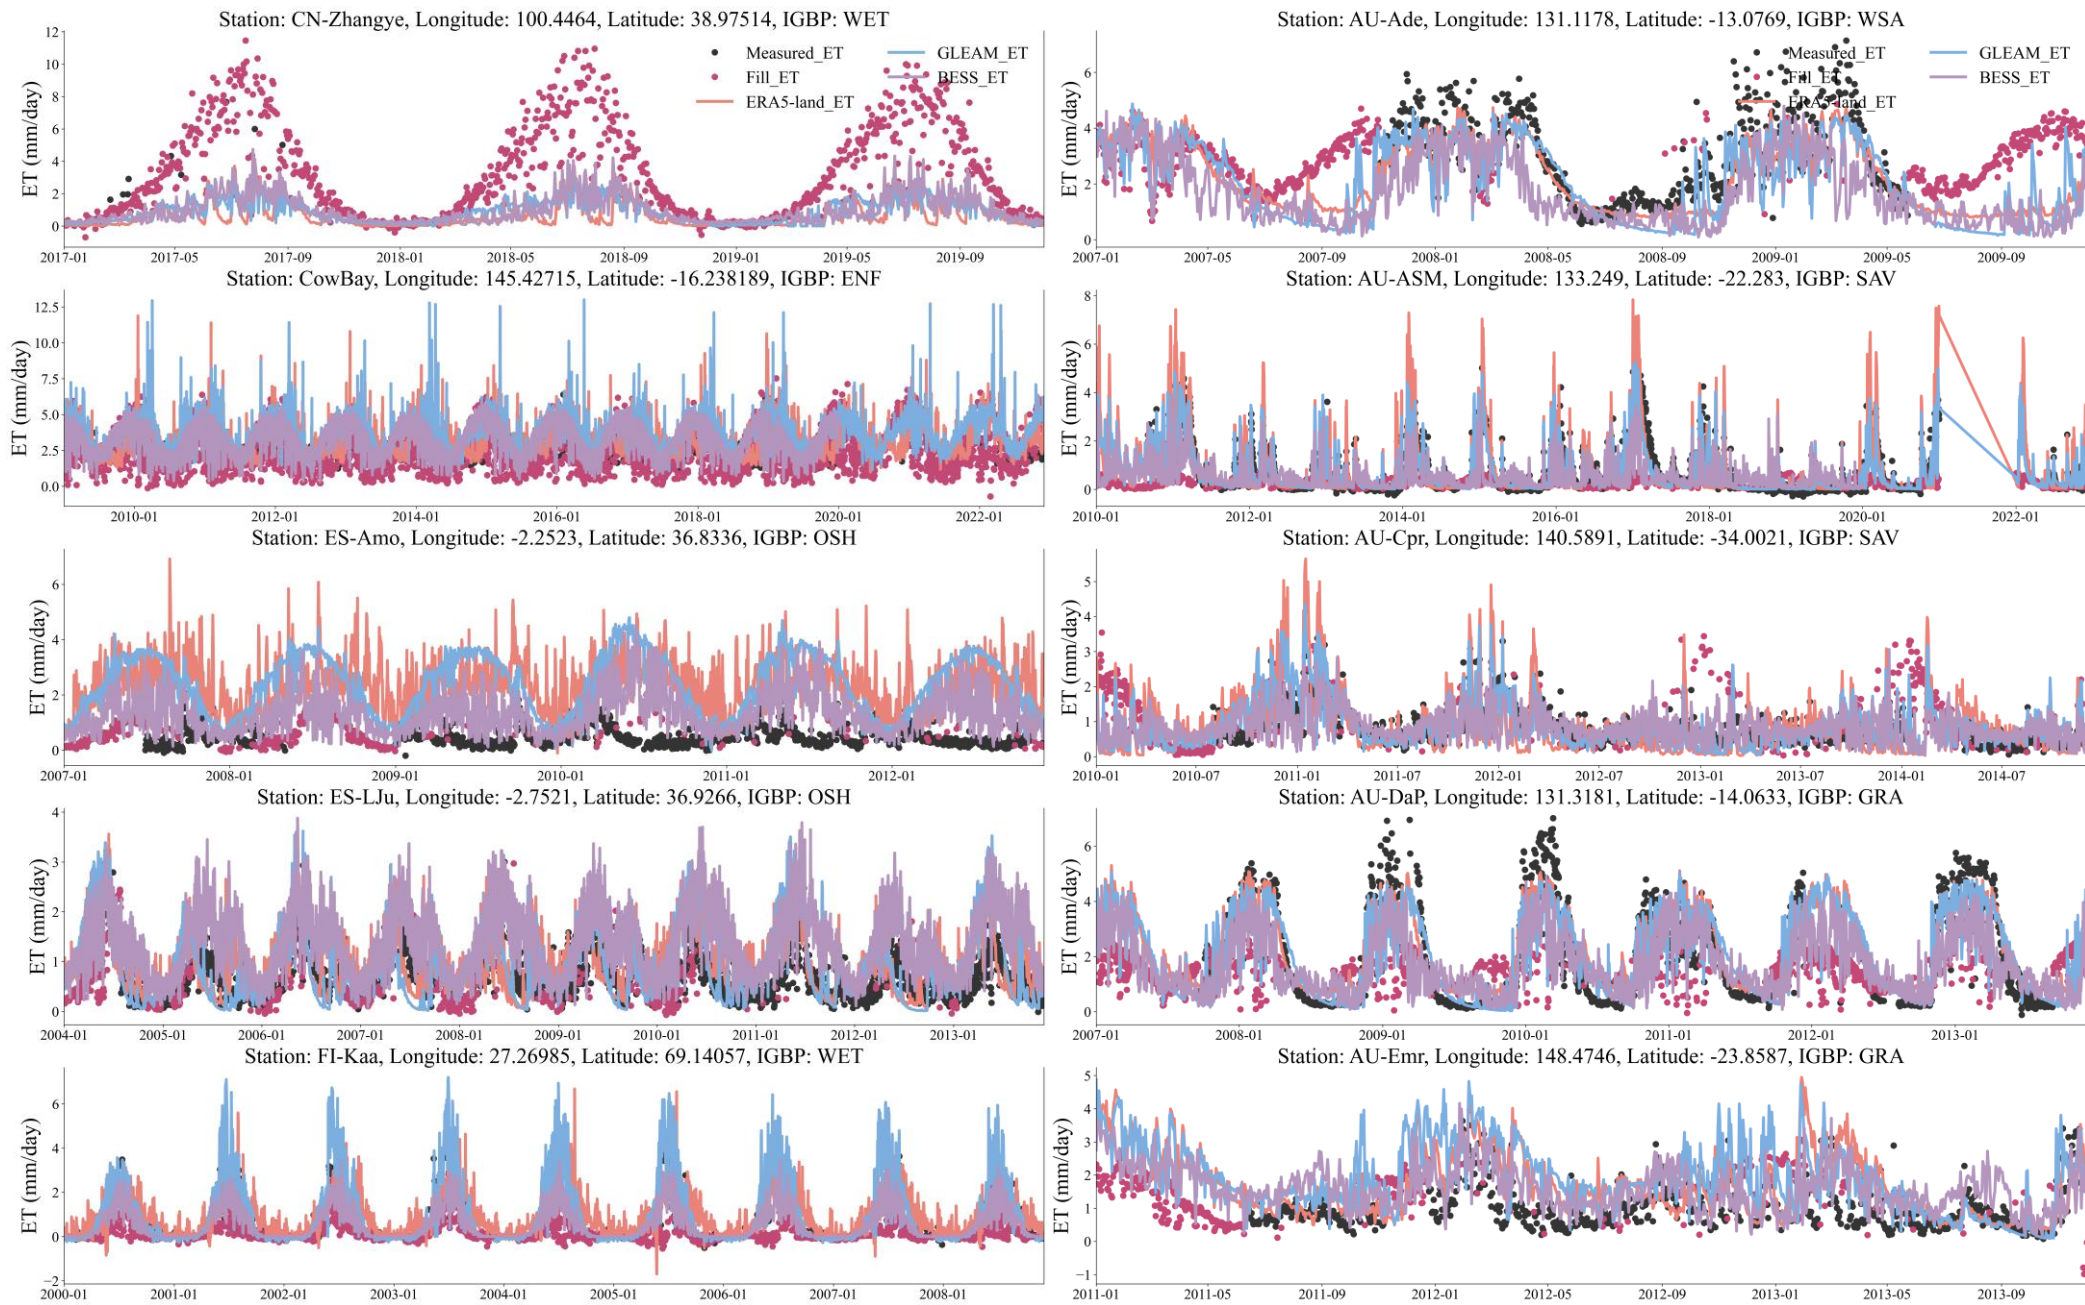

Figure.1S-2 Sites with value range differences between the filled ET and ET products.

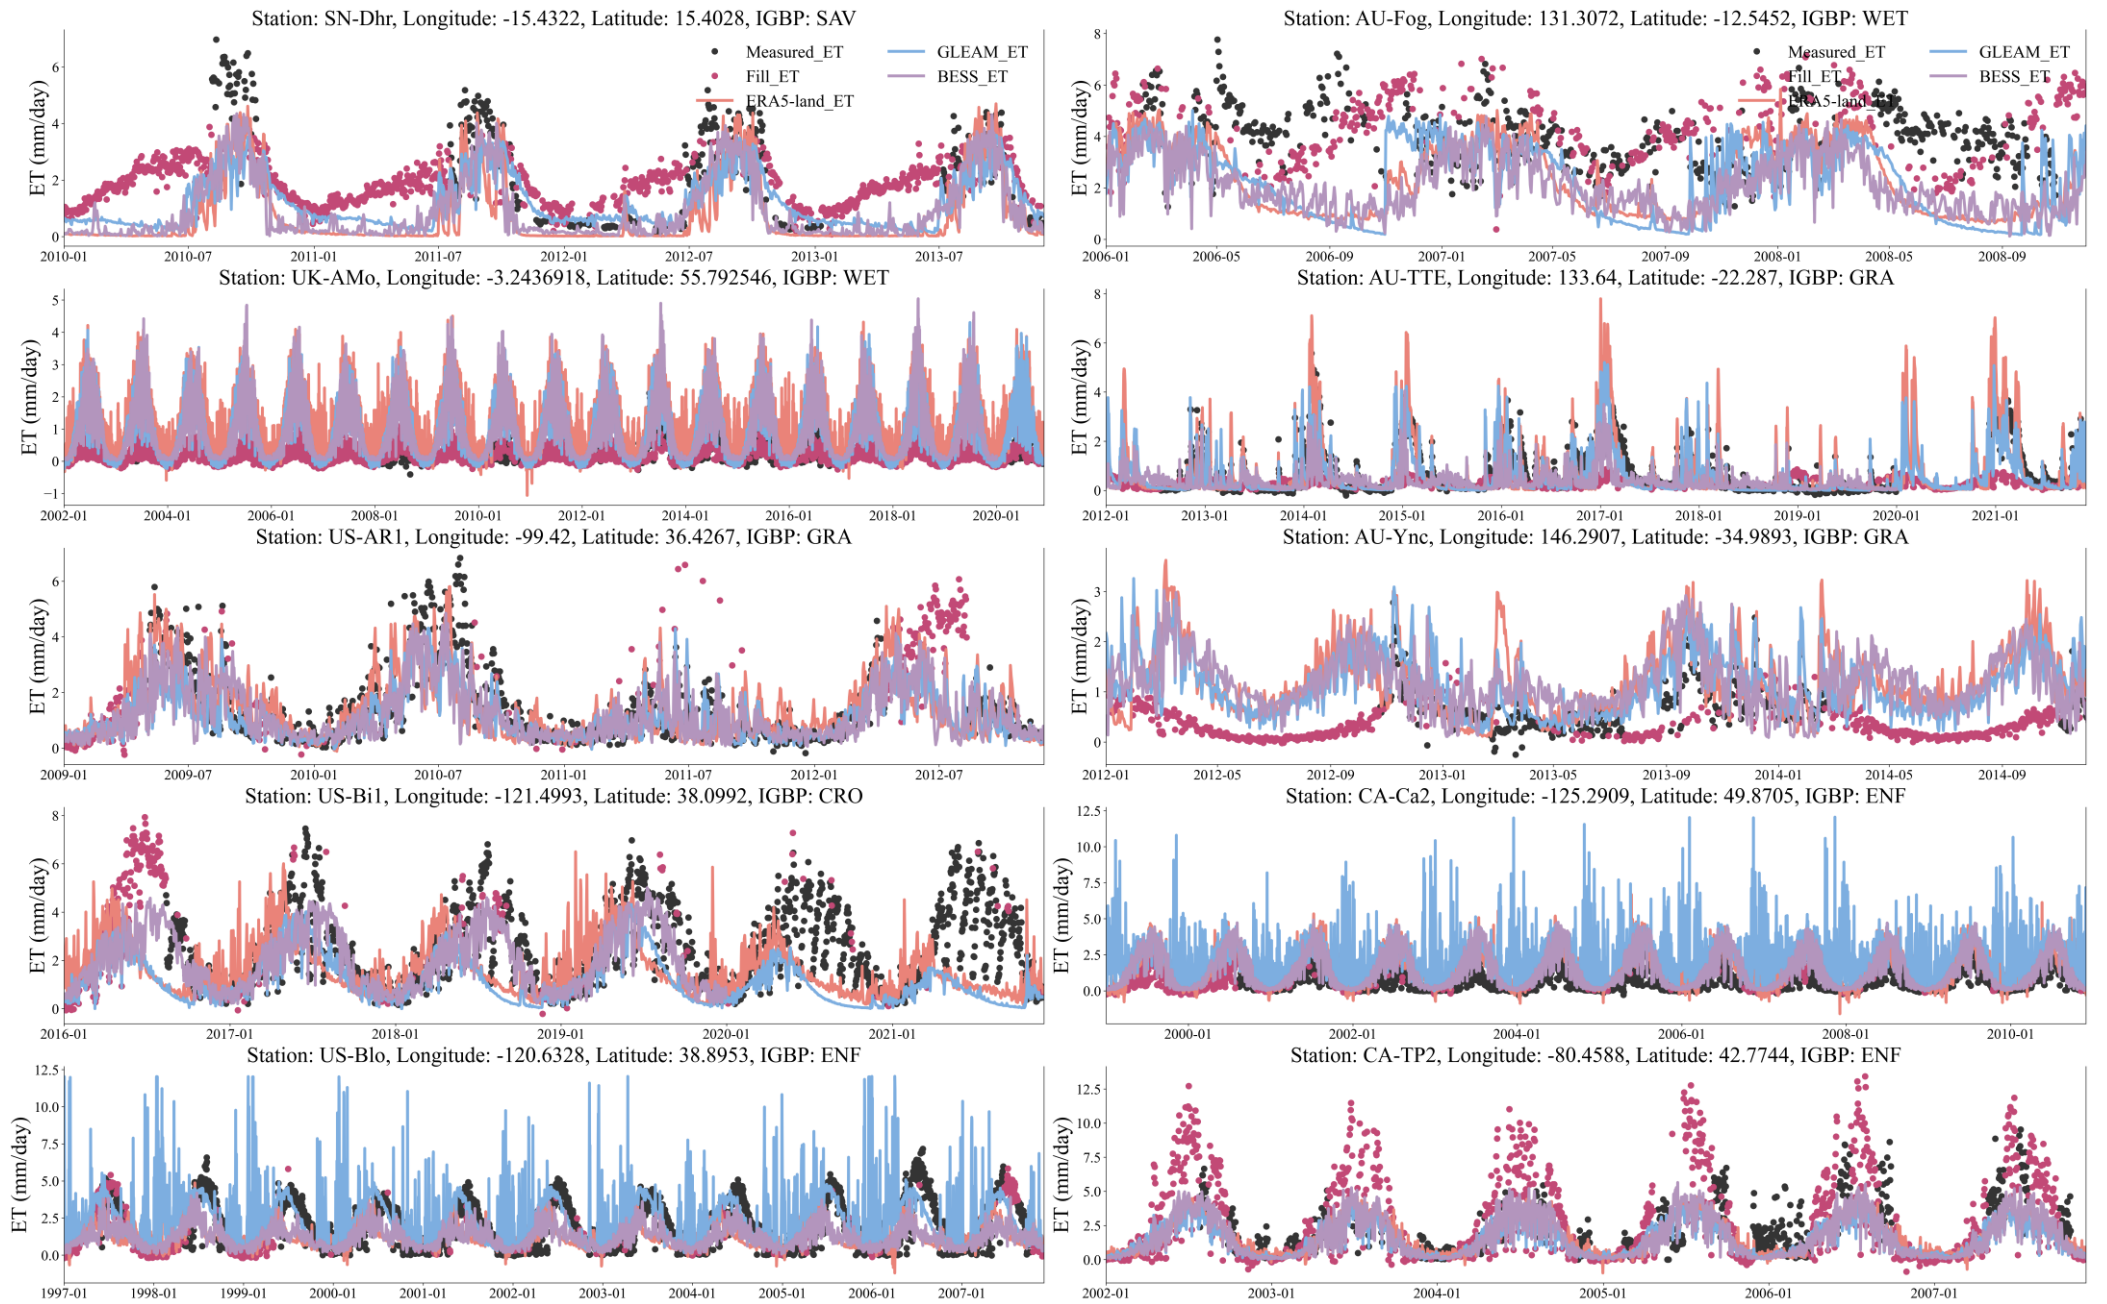

Figure.1S-3 Sites with value range differences between the filled ET and ET products.

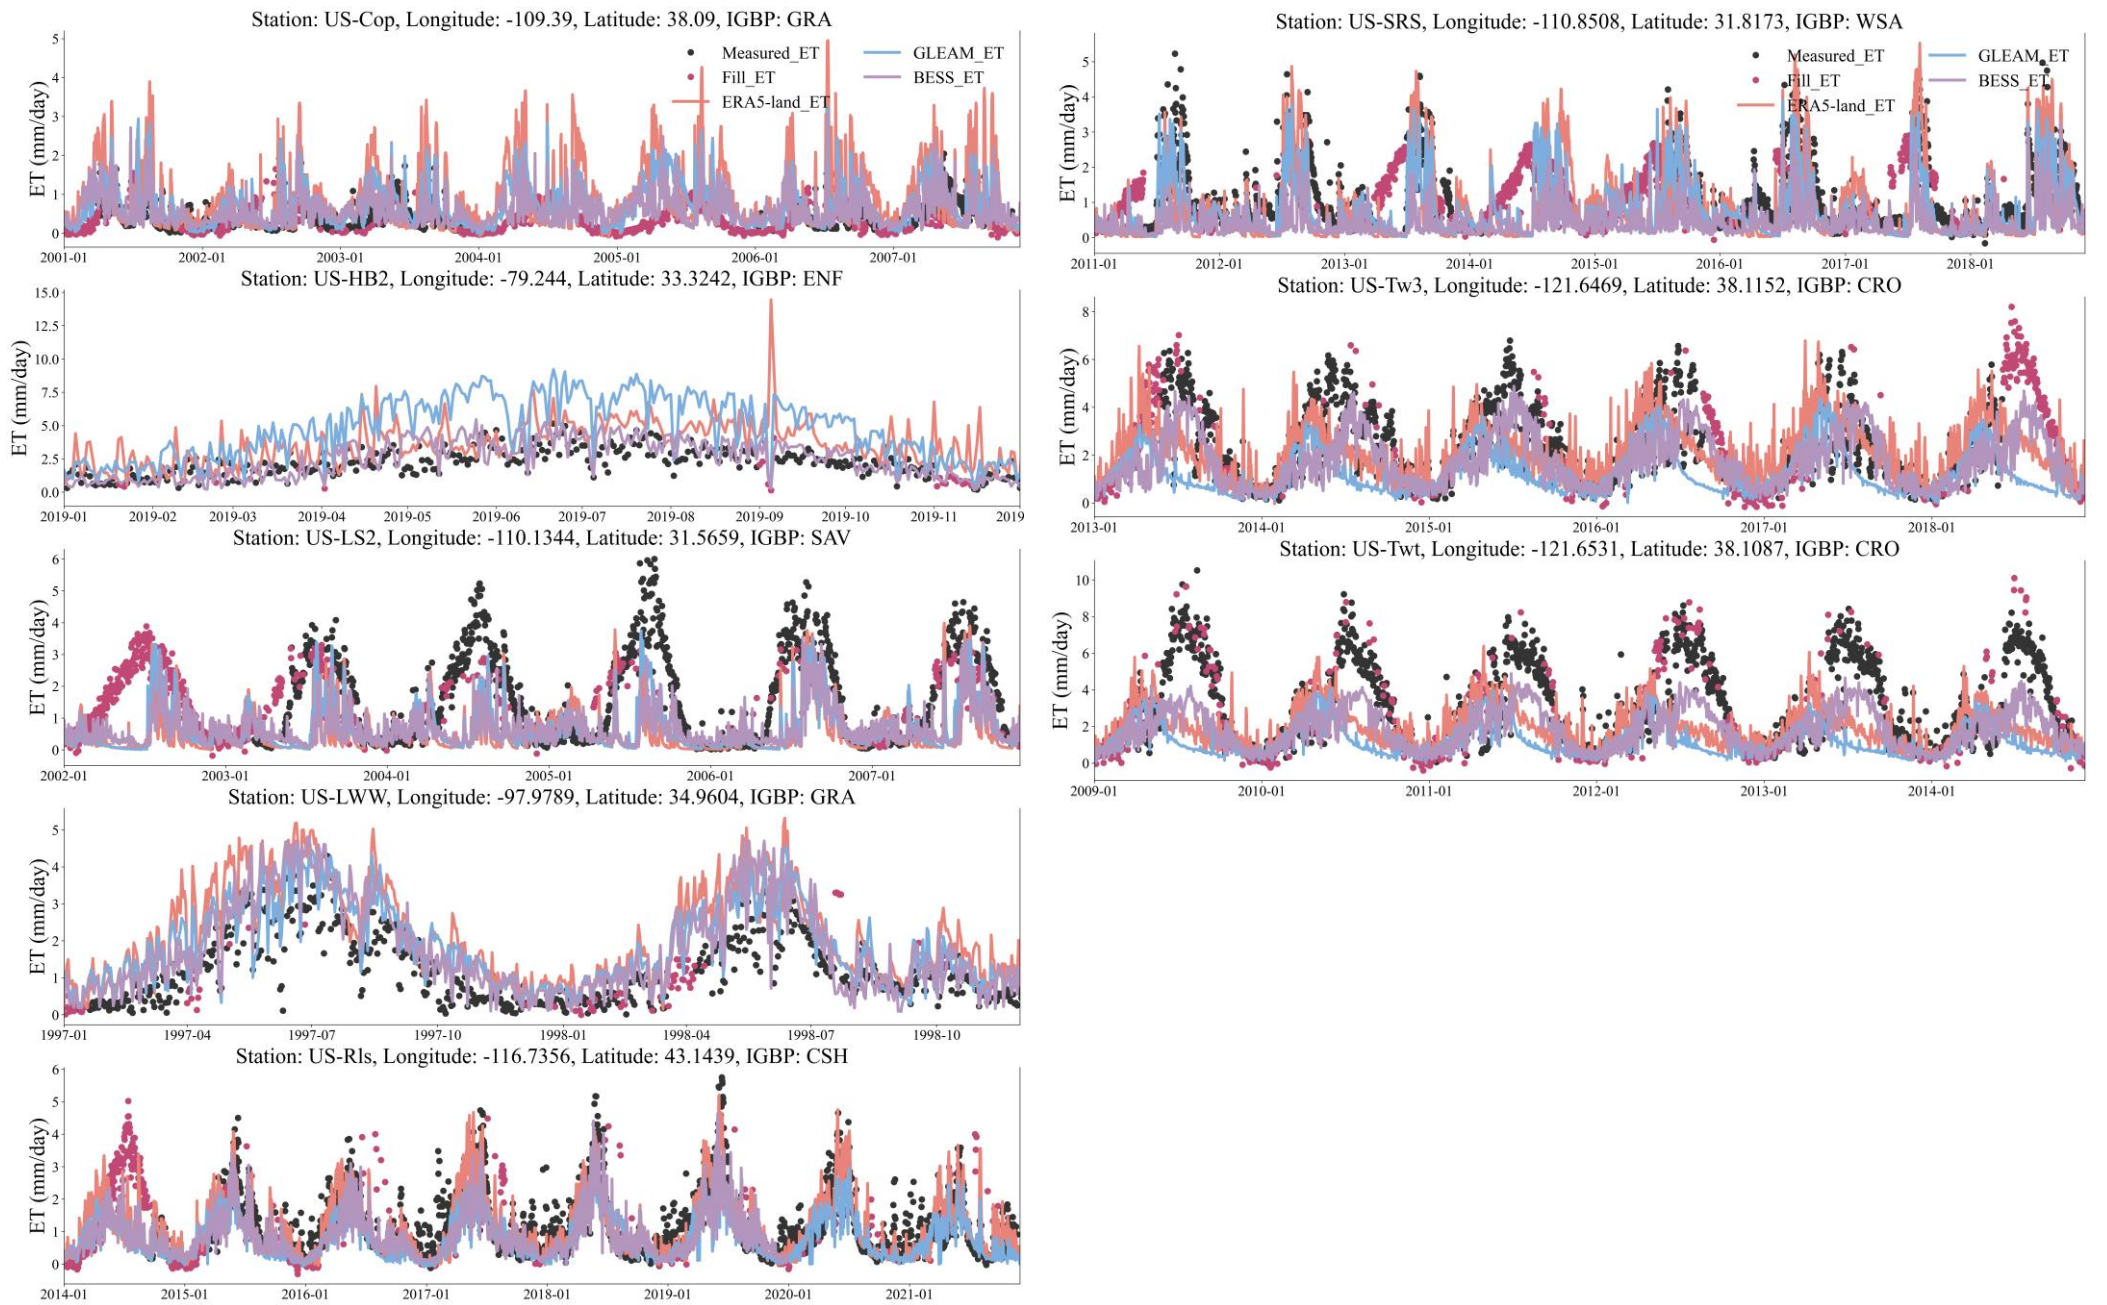

Figure.1S-4 Sites with value range differences between the filled ET and ET products.

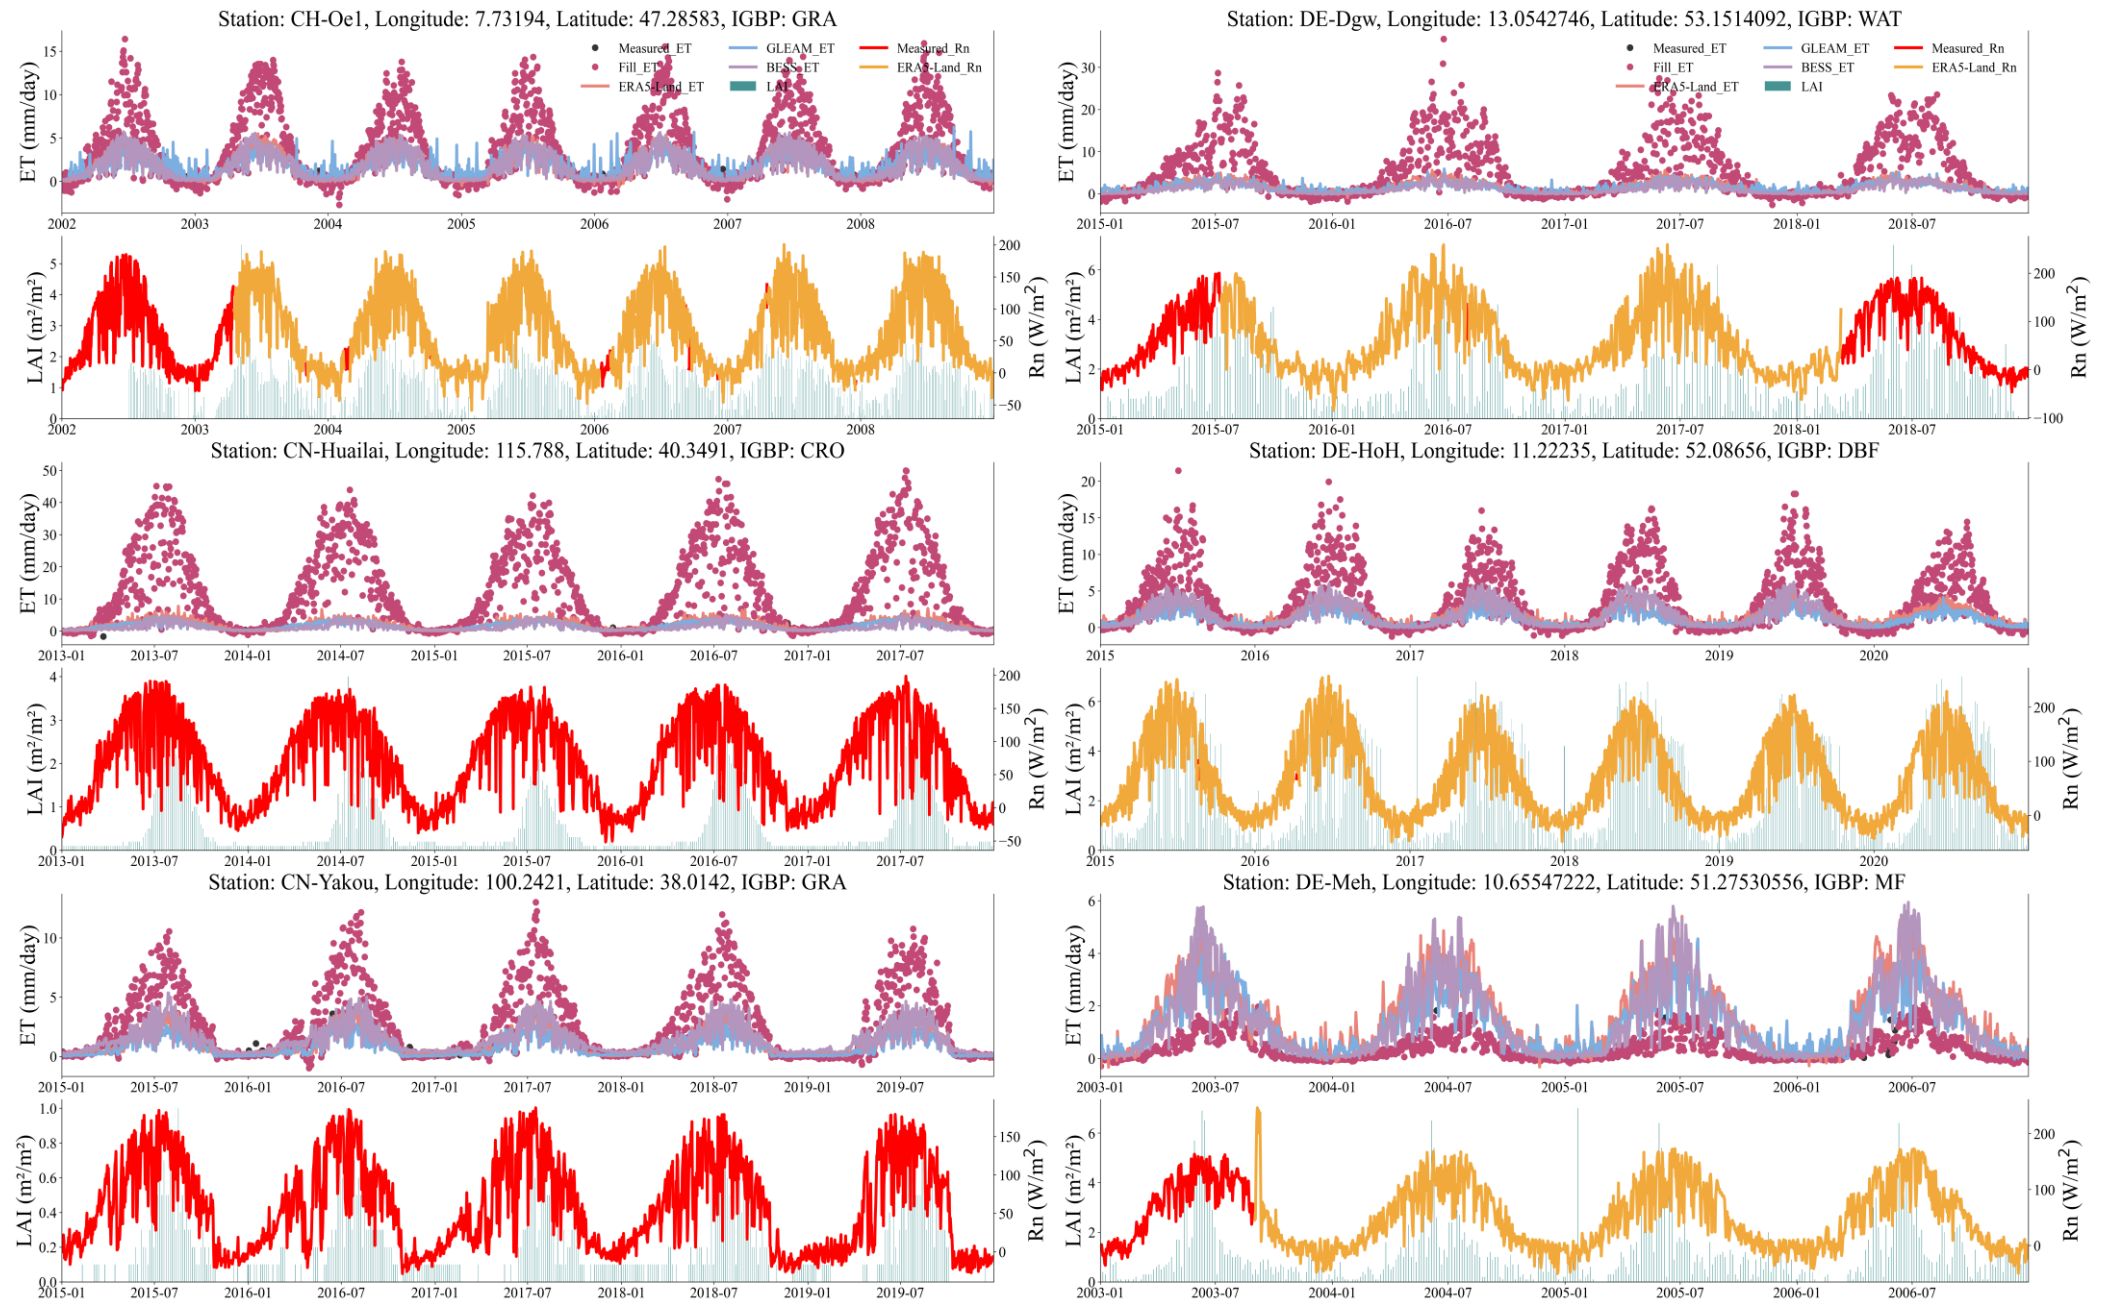

Figure.2S-1 Filled ET for uncertain sites.

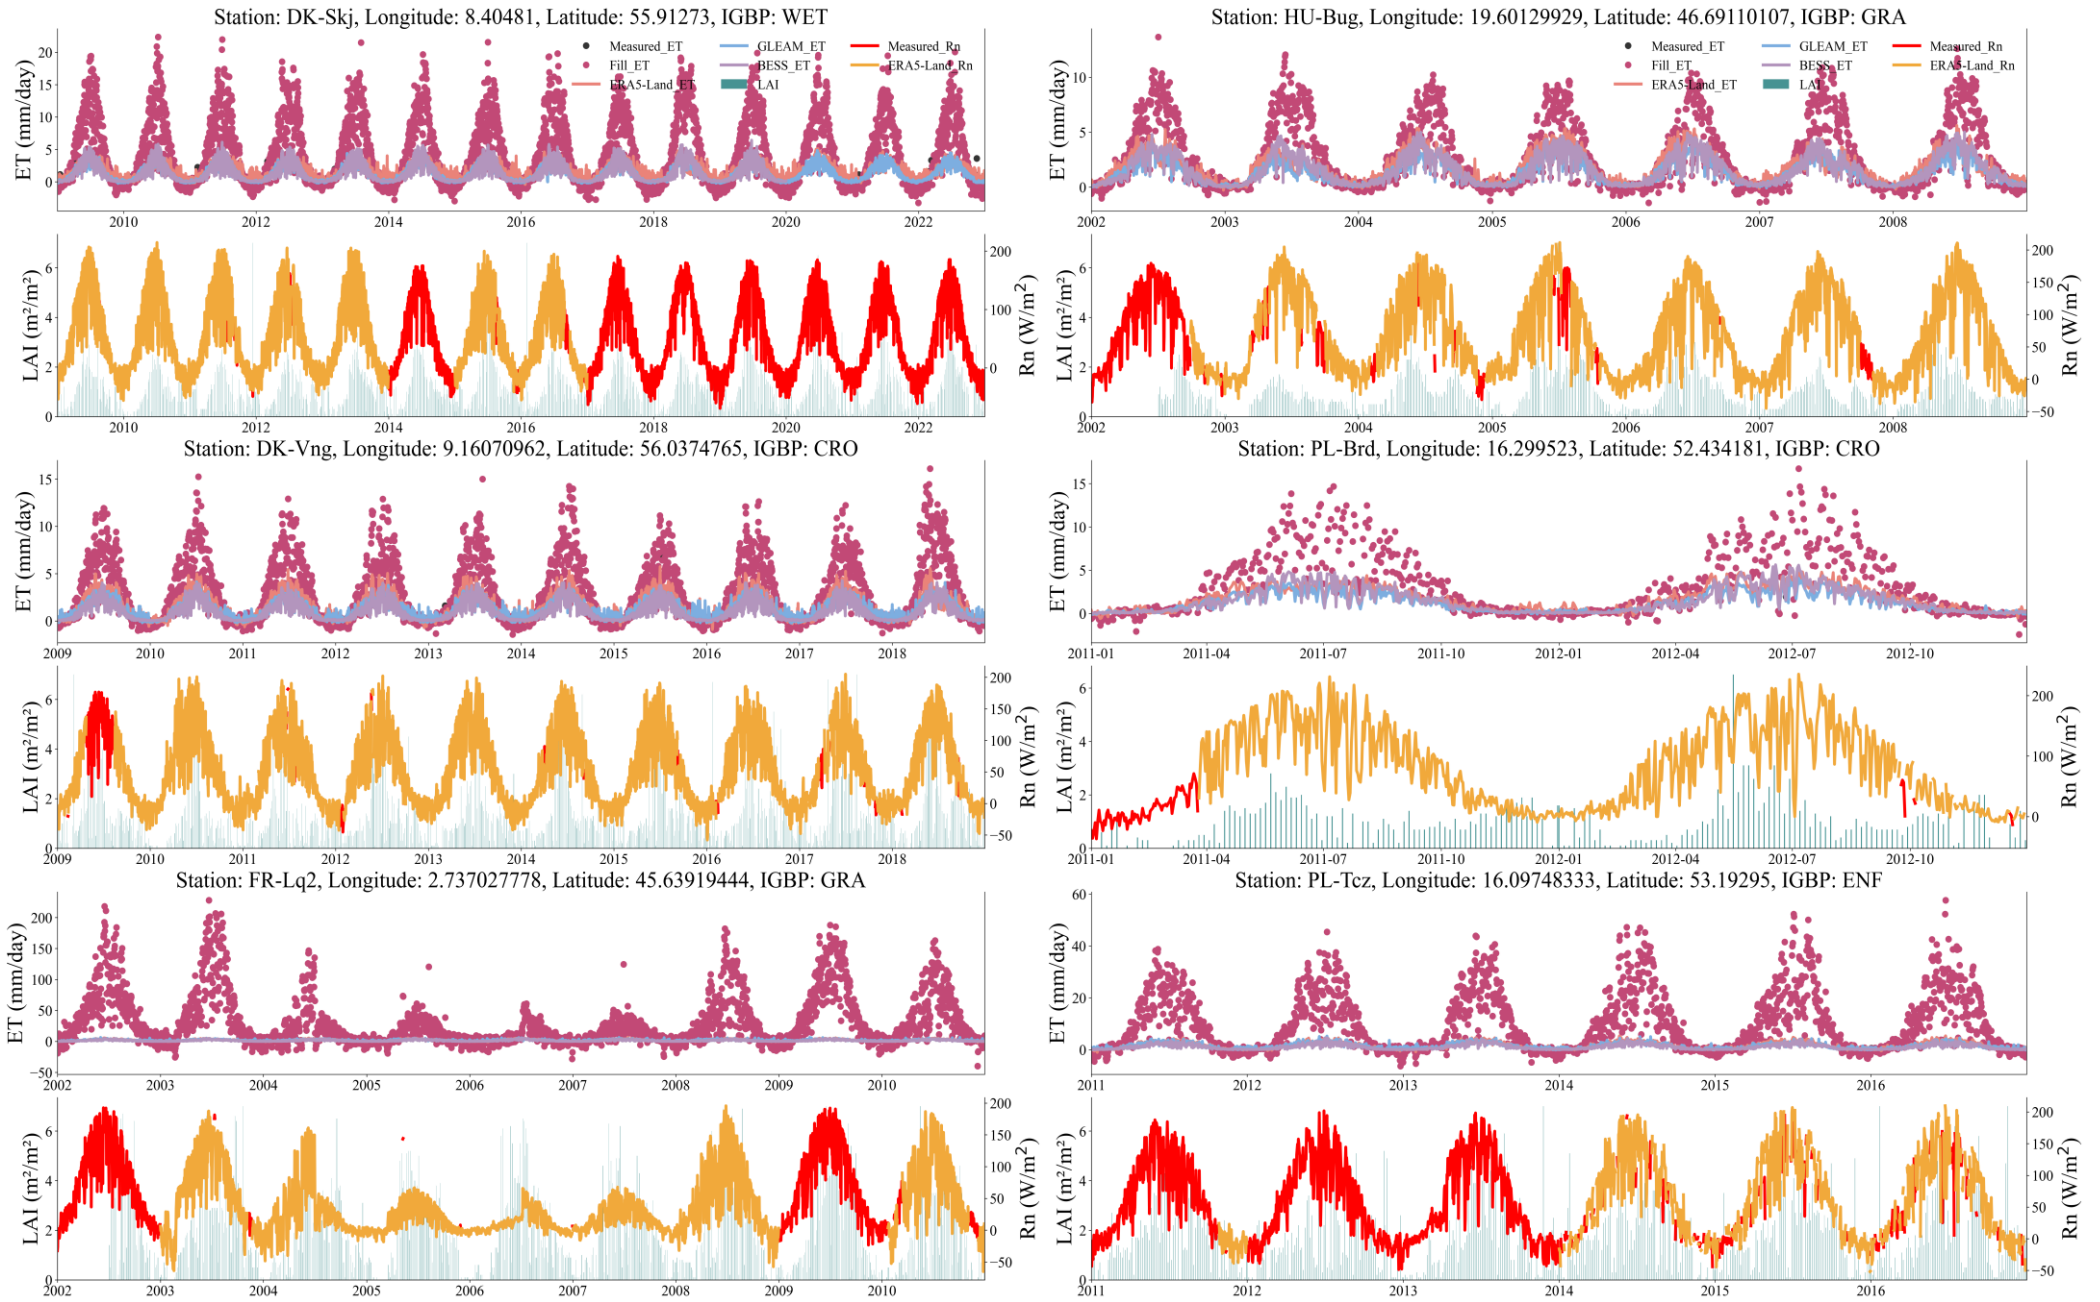

Figure.2S-2 Filled ET for uncertain sites.

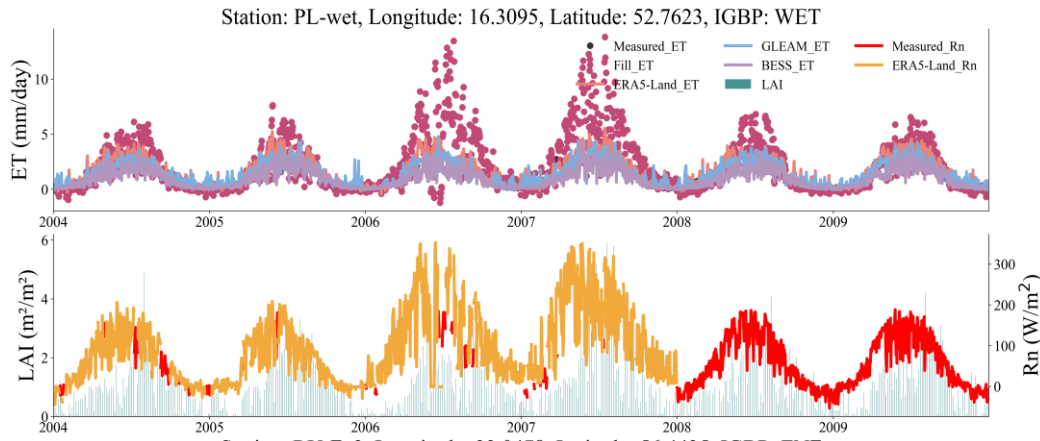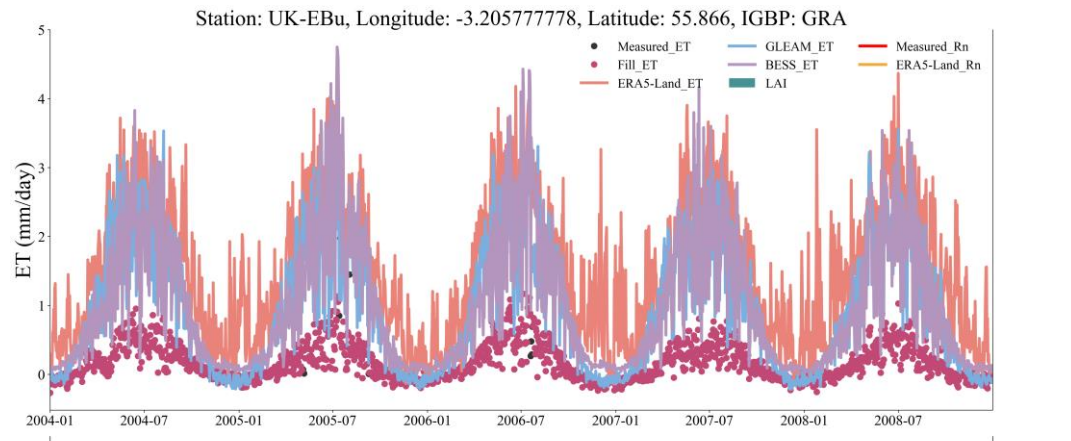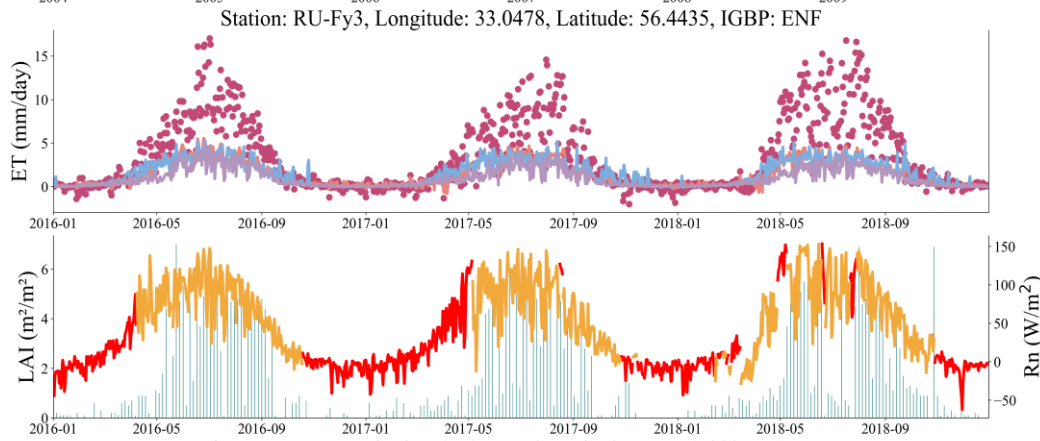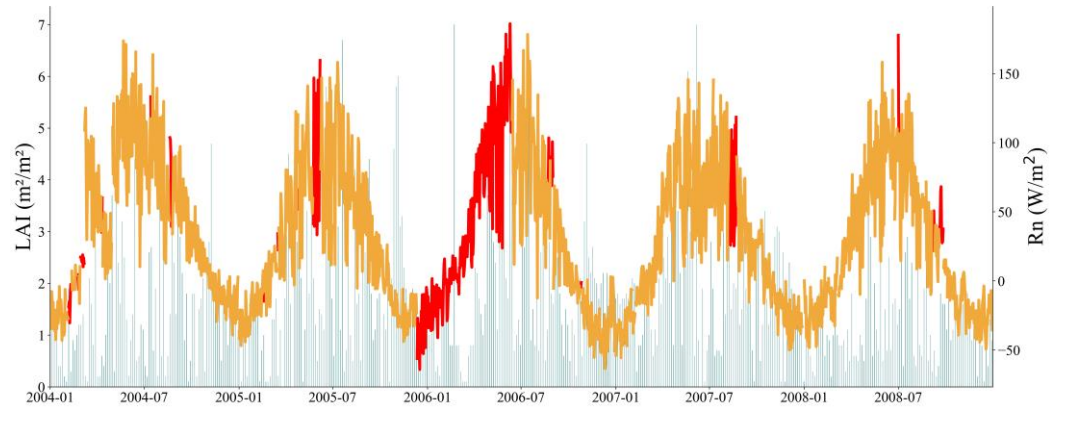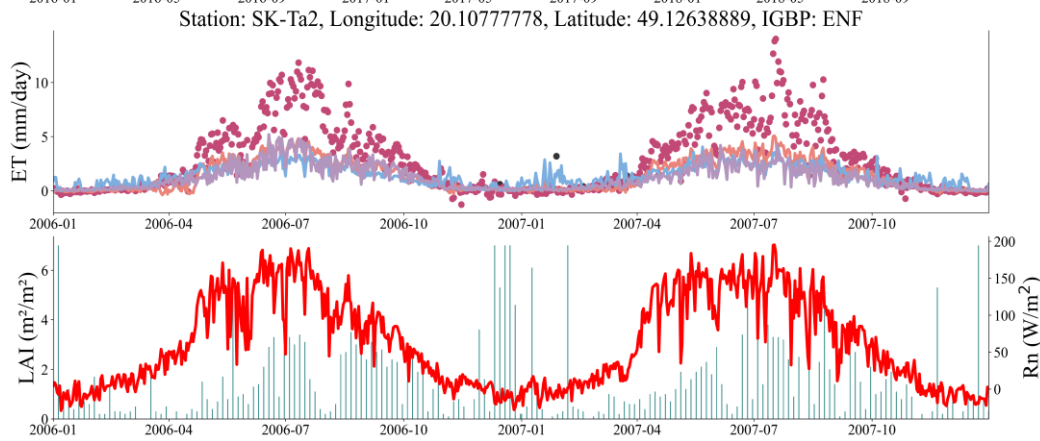

Figure.2S-3 Filled ET for uncertain sites.
